# Supplementary material for: Morphology-controlled synthesis of sunlight-driven plasmonic photocatalysts Ag@AgX (X = Cl, Br) with graphene oxide template
Source: Royal Society of Chemistry journal article supplement (doi:10.1039/c3ta12893h), 2013-01-01
Supplement: c3ta12893h.pdf [file c3ta12893h.pdf]

## Electronic Supplementary Information

### Morphology-controlled synthesis of sunlight-driven plasmonic photocatalysts

#### Ag@AgX (X=Cl, Br) with graphene oxide template

Yanqing Wang,\* Ling Sun and Bunshi Fugetsu

*Laboratory of Environmental Remediation/Nano-Technology Industrialization, Graduate School of Environmental*

*Science, Hokkaido University, Kita8, Nishi4, KitaKu, Sapporo 001-0021, Hokkaido, Japan.*

*Fax: +81 011-706-9294; Tel: +81 011-706-9235; E-mail: wang2011@ees.hokudai.ac.jp*

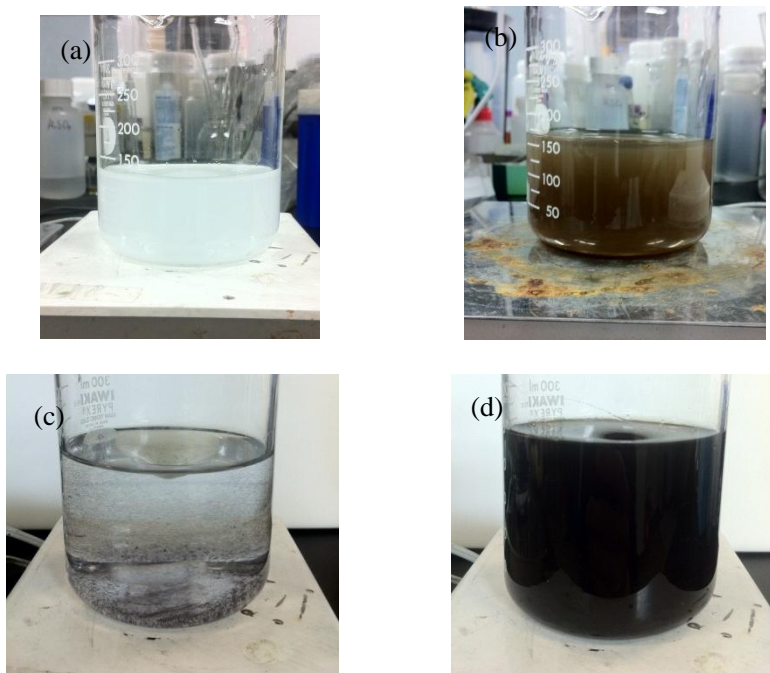

Fig. S1. Photo images of for the synthesis of Ag@AgCl (a, c) and Ag@AgCl@Graphene (b, d) in the process of the addition of NaCl solution and UV irradiation, respectively.

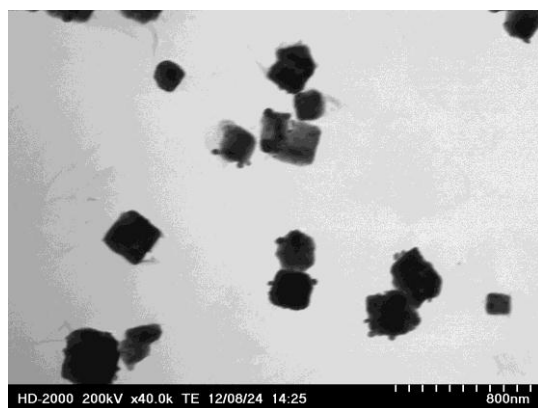

Fig. S2. Representative TEM image of the as-prepared cubic Ag@AgCl@Graphene nanocomposites.

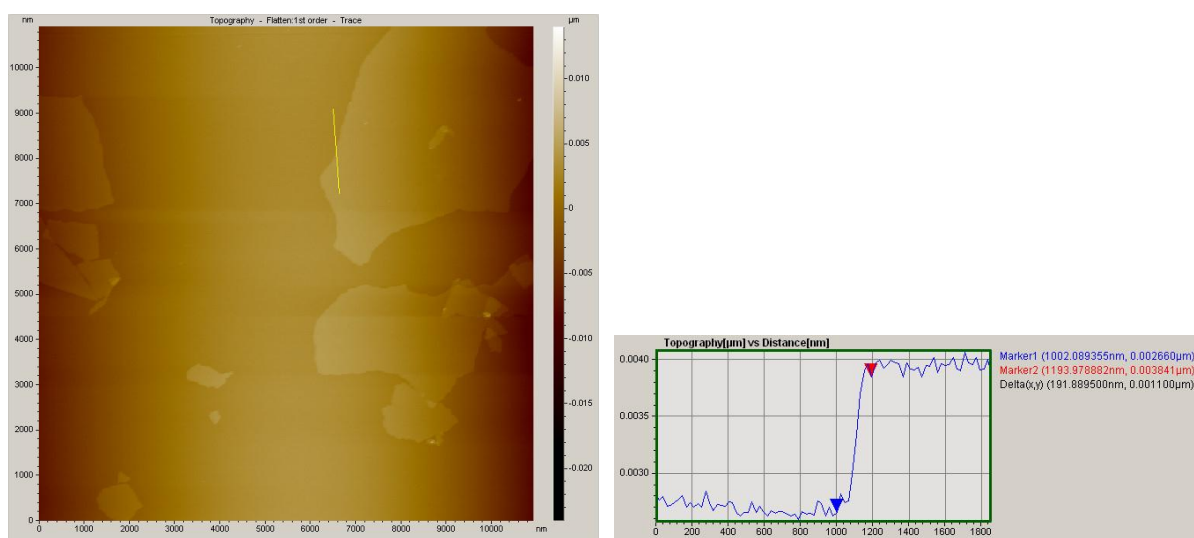

Fig. S3. A typical AFM image of the GO sheets on a mica substrate. The thickness of the GO sheets is estimated to be ~1.1 nm.

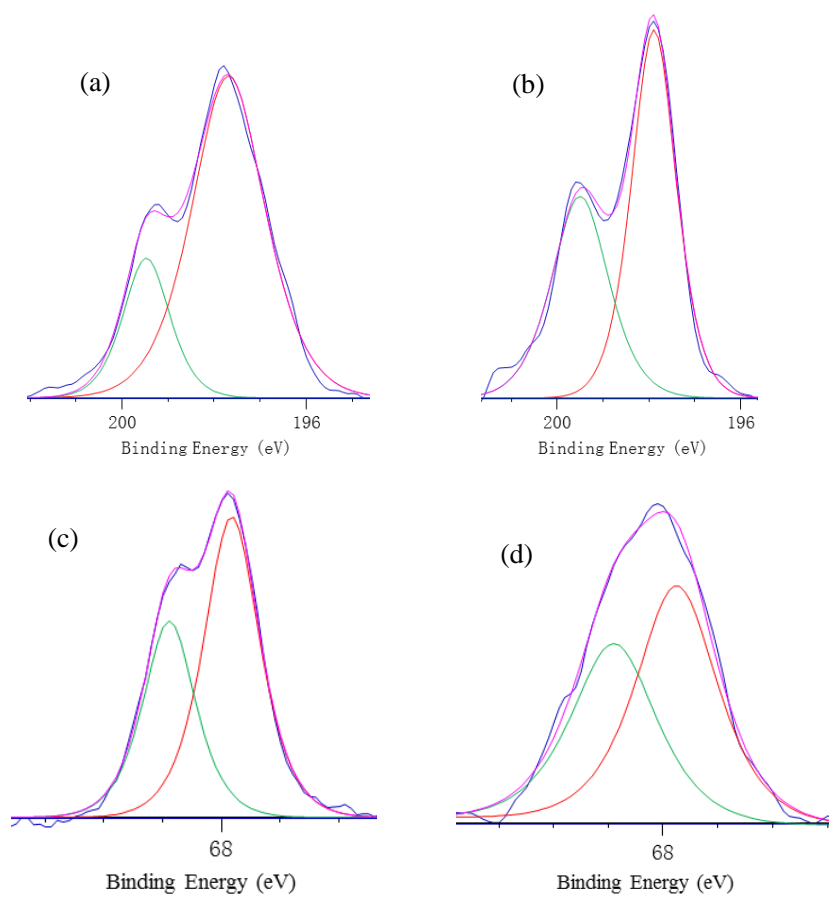

Fig. S4. XPS spectra of Cl 2p of (a) bare Ag@AgCl, (b) Ag@AgCl@Graphene and Br 2p of (c) bare Ag@AgBr, (d) Ag@AgBr@Graphene nanocomposites.
